# Supplementary material for: Cu2O-directed in situ growth of Au nanoparticles inside HKUST-1 nanocages
Source: Royal Society of Chemistry journal article supplement (doi:10.1039/c6nr07318b), 2016-01-01
Supplement: c6nr07318b1.pdf [file c6nr07318b1.pdf]

## Electronic Supplementary Information

### **Cu<sub>2</sub>O-Directed in Situ Growth of Au Nanoparticles inside HKUST-1**

#### **Nanocages**

Yongxin Liu,<sup>a,c</sup> Ting Liu,<sup>c</sup> Long Tian,<sup>c</sup> Linlin Zhang,<sup>c</sup> Lili Yao,<sup>c</sup> Taixing Tan,<sup>c</sup> Jin Xu,<sup>c</sup> Xiaohui Han,<sup>c</sup> Dan Liu<sup>\*b,c</sup> and Cheng Wang<sup>\*b,c</sup>

<sup>a</sup> Department of Polymer Materials and Chemical Engineering, School of Materials Science and Engineering, East China Jiaotong University, 808 Shuanggang East Street, Nanchang, Jiangxi, 330013, P. R. China.

<sup>b</sup> Institute for New-Energy Materials and Low-Carbon Technologies, Tianjin University of Technology, Tianjin 300384, P. R. China

<sup>c</sup> State Key Laboratory of Rare Earth Resources Utilization, Changchun Institute of Applied Chemistry, Chinese Academy of Sciences, 5625 Renmin Street, Changchun, Jilin, 130022, P. R. China. Email: cwang@ciac.ac.cn, liudan2007@ciac.ac.cn; Tel: +86 431 85262770

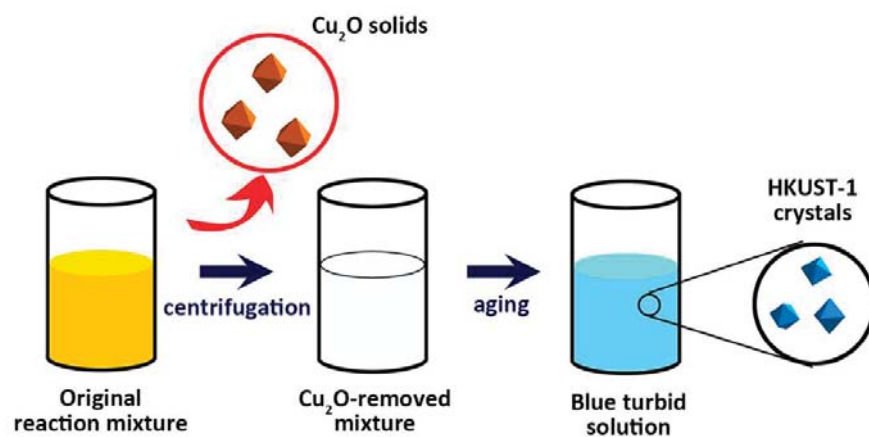

**Fig. S1** Illustration of the evolution of  $\text{Cu}_2\text{O}$ -removed mixture: the colorless solution gradually converted to blue turbid solution after aging for some time.

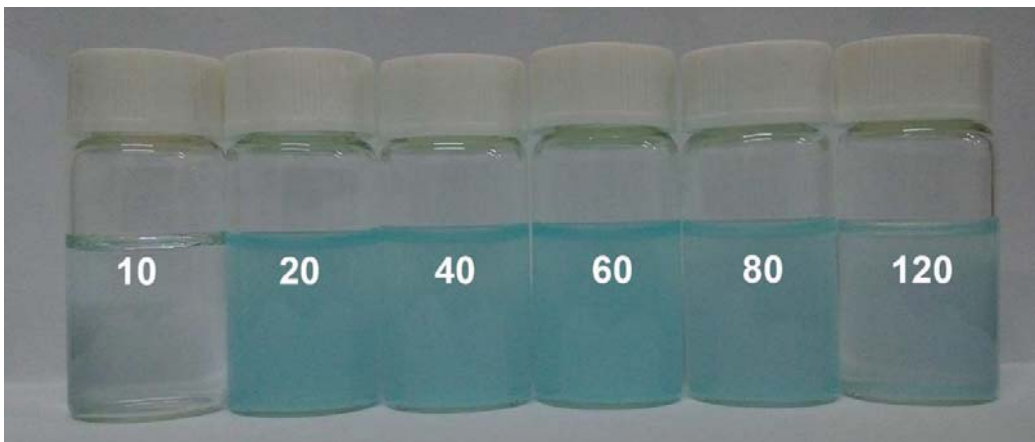

**Fig. S2** The evolution after aging 3 hours of Cu<sub>2</sub>O-removed mixture obtained from the original reaction mixture after reaction durations of 10 min, 20 min, 40 min, 60 min, 80 min and 120 min, respectively.

It is noted that the blue color of the first and last vial (obtained from the original reaction mixture after reaction durations of 10 min and 120 min, respectively) are washy than others indicating that the concentration of Cu<sup>2+</sup> cations was low. It could be concluded that the dissolution of Cu<sub>2</sub>O was slight in the initial 10 minutes while the construction of HKUST-1 crystals consumed large amounts of Cu<sup>2+</sup> cations in solution after reaction durations of 120 minutes.

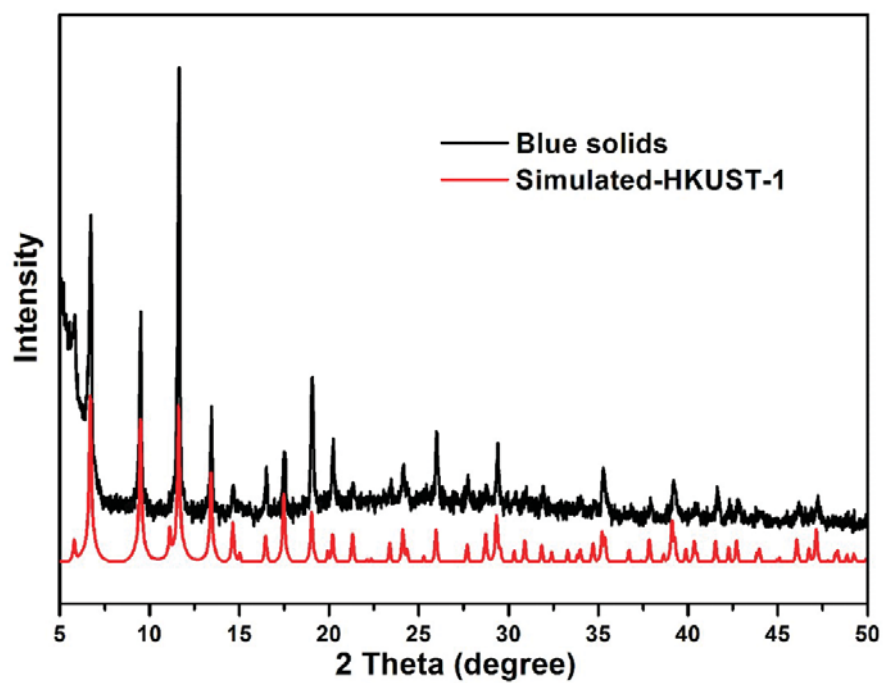

**Fig. S3** XRD spectrum of the blue solids obtained from the  $\text{Cu}_2\text{O}$ -removed mixture after aging.

XRD spectrum suggests that the blue component are HKUST-1 crystals.

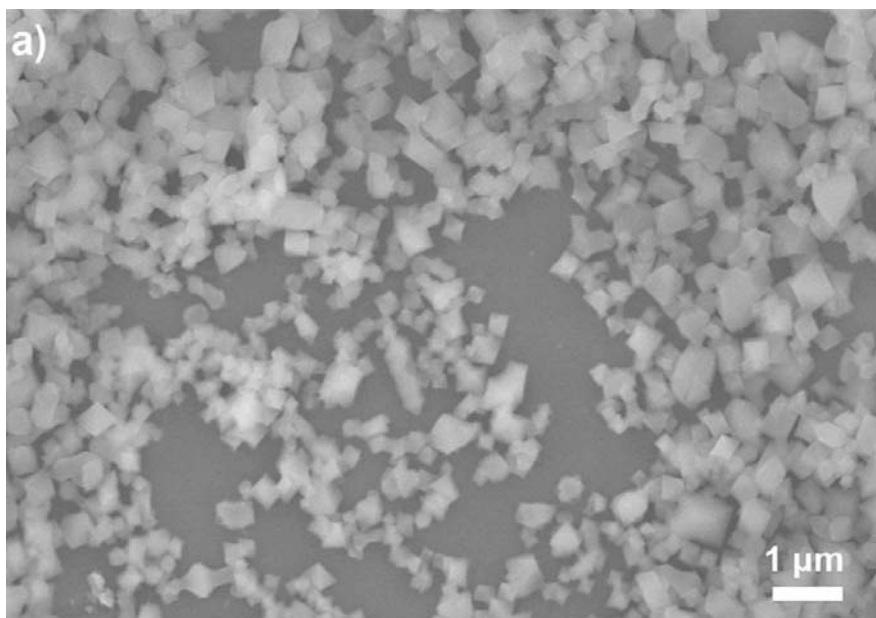

**Fig. S4** SEM image of the blue solids obtained from the  $\text{Cu}_2\text{O}$ -removed mixture after aging.

SEM image suggests that the blue component are HKUST-1 crystals.

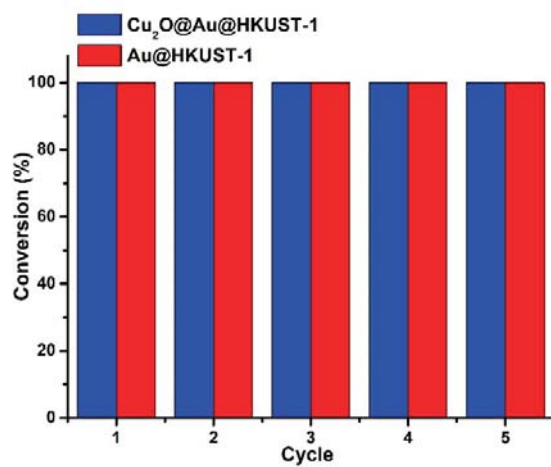

**Fig. S5** Activity recyclability tests for 5 cycles of CO oxidation under the same conditions over  $\text{Cu}_2\text{O@Au@HKUST-1}$  sandwich core-shell heterostructures and  $\text{Au@HKUST-1}$  balls-in-cage heterostructures.

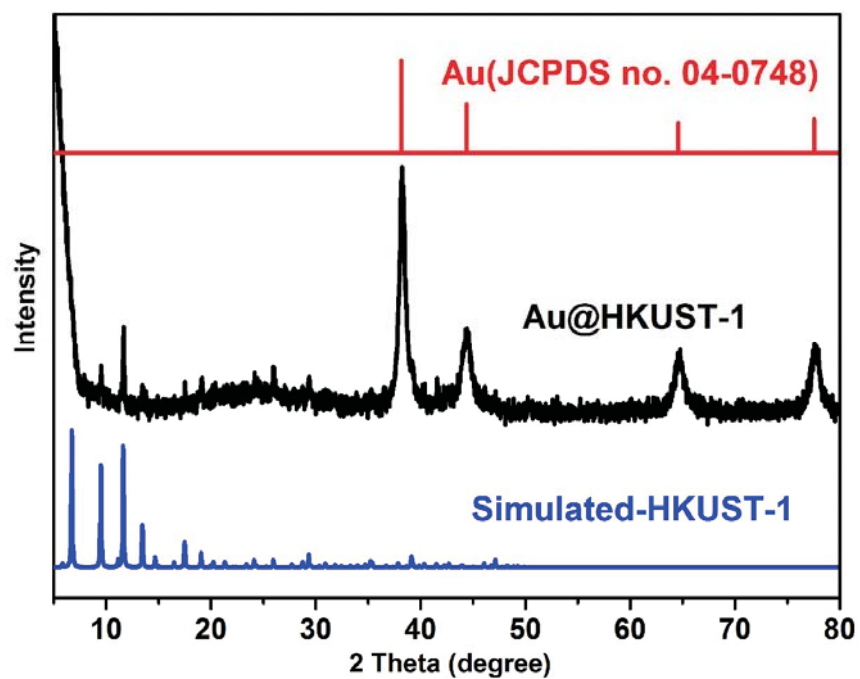

**Fig. S6** XRD spectra of standard Au, simulated HKUST-1 and Au@HKUST-1 balls-in-cage heterostructures after catalytic reaction of CO for two hours at 190 °C.
